# Supplementary material for: Impact of surface adsorbed biologically and environmentally relevant coatings on TiO2 nanoparticle reactivity
Source: Royal Society of Chemistry journal article supplement (doi:10.1039/d0en00706d), 2020-01-01
Supplement: d0en00706d1.pdf [file d0en00706d1.pdf]

## Electronic Supplementary Information for:

# Impact of Surface Adsorbed Biologically and Environmentally Relevant Coatings on TiO<sub>2</sub> Nanoparticle Reactivity

Haibin Wu,<sup>1</sup> Liubin Huang,<sup>1</sup> Amber Rose,<sup>1</sup> Vicki H. Grassian<sup>1,2\*</sup>

<sup>1</sup>Department of Chemistry & Biochemistry, University of California San Diego, La Jolla, CA 92093, United States

<sup>2</sup>Departments of Nanoengineering, University of California San Diego, La Jolla, CA 92093, United States, and Scripps Institution of Oceanography, University of California San Diego, La Jolla, CA 92093, United States

\*To whom correspondence should be addressed: [vhgrassian@ucsd.edu](mailto:vhgrassian@ucsd.edu)

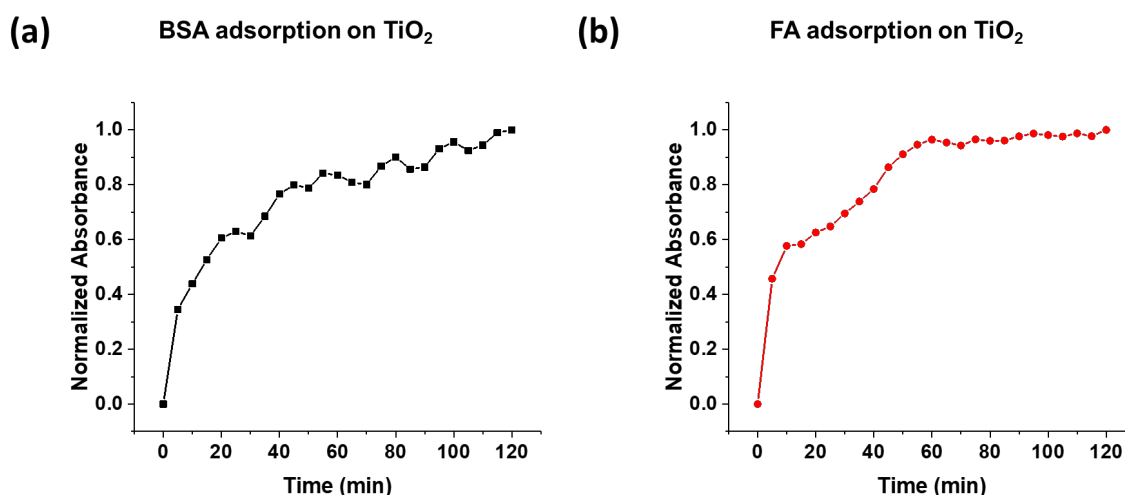

**Figure S1.** Normalized absorbance of the ATR-FTIR spectra following (a) BSA and (b) FA adsorption on TiO<sub>2</sub> NPs as a function of time. These normalized absorbances correspond to surface saturation coverages at longer times (120 minutes) for absorption bands at 1544 cm<sup>-1</sup> for BSA and 1568 cm<sup>-1</sup> for FA.

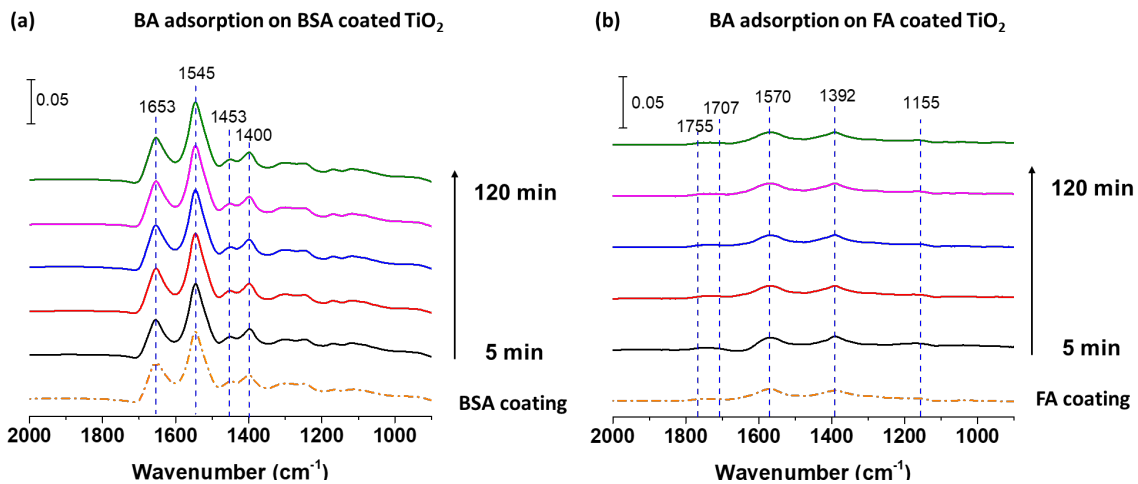

**Figure S2.** ATR-FTIR spectra of BA adsorption on coated TiO<sub>2</sub> NPs, specifically for (a) BSA coated TiO<sub>2</sub> and (b) FA coated TiO<sub>2</sub>. Spectra s were collected at 5 min (black), 30 min (red), 60 min (blue), 90 (magenta), 120 min (green) and the orange dash line represent BA and FA adsorption on TiO<sub>2</sub> NPs in the absence of BA.
